# Supplementary material for: Methodological Principles of Nasal Food Challenge
Source: MDPI journal article supplement (doi:10.3390/nu15173816), 2023-08-31
Supplement: s1 [file s1]

| The Nasal Food Challenge Protocol                                                                             |                                                                                                                      |                                                                                                                         |                                                                                                       | Test date                                                                    |
|---------------------------------------------------------------------------------------------------------------|----------------------------------------------------------------------------------------------------------------------|-------------------------------------------------------------------------------------------------------------------------|-------------------------------------------------------------------------------------------------------|------------------------------------------------------------------------------|
| Name (first, last) .....                                                                                      |                                                                                                                      |                                                                                                                         |                                                                                                       | Gender M <input type="checkbox"/><br>F <input type="checkbox"/><br>Age ..... |
| <b>*Exclusion criteria</b>                                                                                    |                                                                                                                      |                                                                                                                         |                                                                                                       |                                                                              |
| History of anaphylactic shock; <input type="checkbox"/>                                                       | Nose deformations; <input type="checkbox"/>                                                                          | Atrophic rhinitis; <input type="checkbox"/>                                                                             | History of vaccination within the last week; <input type="checkbox"/>                                 |                                                                              |
| Surgeries within the last; 8 weeks; <input type="checkbox"/>                                                  | Upper respiratory tract infections; <input type="checkbox"/>                                                         | Exacerbation of an allergic disease; <input type="checkbox"/>                                                           | Uncontrolled asthma; <input type="checkbox"/>                                                         |                                                                              |
| Lower respiratory tract diseases involving severe airway restriction or obstruction; <input type="checkbox"/> | Contraindications to adrenaline, pharmacotherapy including $\beta$ -adrenolytics and ACEIs; <input type="checkbox"/> | Lack of access to equipment and medications necessary for the treatment of anaphylactic shock; <input type="checkbox"/> | Significant natural exposure to allergen resulting in a risk of anaphylaxis; <input type="checkbox"/> |                                                                              |
| Systemic immunotherapy; <input type="checkbox"/>                                                              | Severe heart disease; <input type="checkbox"/>                                                                       | Severe systemic diseases; <input type="checkbox"/>                                                                      | Pregnancy <input type="checkbox"/>                                                                    |                                                                              |
| <b>control solution challenge</b>                                                                             |                                                                                                                      |                                                                                                                         |                                                                                                       |                                                                              |
| <b>Subjective assessment (VAS)</b>                                                                            | nasal itching                                                                                                        | 0                                                                                                                       | _____                                                                                                 | 10                                                                           |
|                                                                                                               | number of sneezes                                                                                                    | 0                                                                                                                       | _____                                                                                                 | 10                                                                           |
|                                                                                                               | discharge                                                                                                            | 0                                                                                                                       | _____                                                                                                 | 10                                                                           |
|                                                                                                               | obstruction                                                                                                          | 0                                                                                                                       | _____                                                                                                 | 10                                                                           |
| <b>Objective assessment (OR)</b>                                                                              | RMM                                                                                                                  | PA/cm <sup>3</sup> /s.                                                                                                  |                                                                                                       |                                                                              |
|                                                                                                               | PNIF                                                                                                                 | L/min.                                                                                                                  |                                                                                                       |                                                                              |
|                                                                                                               | RA                                                                                                                   | CSA-1 (cm <sup>2</sup> )<br>CSA-2 (cm <sup>2</sup> )                                                                    |                                                                                                       |                                                                              |
|                                                                                                               | **RO                                                                                                                 | $\Delta E$                                                                                                              |                                                                                                       |                                                                              |

|                                                                                    |                                   |                                                      |                                   |                                 |                          |
|------------------------------------------------------------------------------------|-----------------------------------|------------------------------------------------------|-----------------------------------|---------------------------------|--------------------------|
| Notes                                                                              |                                   |                                                      |                                   |                                 |                          |
| <b>*allergen challenge ( certain doses of allergens: 12.5, 25, 50, and 100 µg)</b> |                                   |                                                      |                                   |                                 |                          |
| <b>Subjective assessment<br/>(VAS)</b>                                             | nasal itching                     | 0                                                    |                                   | 10                              |                          |
|                                                                                    | number of sneezes                 | 0                                                    |                                   | 10                              |                          |
|                                                                                    | discharge                         | 0                                                    |                                   | 10                              |                          |
|                                                                                    | obstruction                       | 0                                                    |                                   | 10                              |                          |
| <b>Objective assessment<br/>(OR)</b>                                               | RMM                               | PA/cm <sup>3</sup> /s.                               |                                   |                                 |                          |
|                                                                                    | PNIF                              | L/min.                                               |                                   |                                 |                          |
|                                                                                    | RA                                | CSA-1 (cm <sup>2</sup> )<br>CSA-2 (cm <sup>2</sup> ) |                                   |                                 |                          |
|                                                                                    | **RO                              | ΔE                                                   |                                   |                                 |                          |
| Notes                                                                              |                                   |                                                      |                                   |                                 |                          |
| <b>*positive challenge test</b>                                                    |                                   | <b>*moderately positive challenge test</b>           |                                   | <b>*negative challenge test</b> |                          |
| VAS/≥55 mm                                                                         | Objective technique               | VAS/≥23 mm                                           |                                   | VAS/no discomfort               |                          |
|                                                                                    | RMM/≥40% flow reduction at 150 Pa |                                                      | RMM/≥20% flow reduction at 150 Pa |                                 | RMM/no flow reduction    |
|                                                                                    | PNIF/≥40% flow reduction          |                                                      | PNIF/≥20% flow reduction          |                                 | PNIF/no flow reduction   |
|                                                                                    | RA/≥40% reduction in CSA-2        |                                                      | RA/≥20% reduction in CSA-2        |                                 | RA/no reduction in CSA-2 |

|  |                                   |  |                                   |  |                             |  |
|--|-----------------------------------|--|-----------------------------------|--|-----------------------------|--|
|  |                                   |  |                                   |  |                             |  |
|  | **RO/ $\Delta$ E: increase by 40% |  | **RO/ $\Delta$ E: increase by 20% |  | RO/ $\Delta$ E: no increase |  |

\* EAACI Position paper on the standardization of nasal allergen challenges [5], \*\* Wüstenberg et al./0.52 OD [12]

Table S1. The Nasal Food Challenge Testing Protocol.
